# Supplementary material
Source: Research Square preprint supplement (doi:10.21203/rs.3.rs-9177028/v1)
Supplement: Supplementary file 1 [file 1297035b6368b4acbf7e72f2.docx]

**Questionnaire**

**Association between Pulmonary Function and Air Quality in Urban Area among Fixed Street Vendors**

Principal investigator: Palanivelan Muruganantham

| Written informed consent is obtained from the participants: | | | | ☐ Yes  ☐ No | | | |
| --- | --- | --- | --- | --- | --- | --- | --- |
| Data collector ID | | | |  | | | |
| Date of data collection | | | | DD/MM/YYYY | | | |
| Time taken by the participant to complete | | | |  | | | |
| **S.No** | | **Section** | | **Response** | | | **Code** |
| **Section I: Demographic Information** | | | | | | | |
|  | | Gender | | ☐ Male  ☐ Female  ☐ Other | | | SD1 |
|  | | Age (years) | |  | | | SD2 |
|  | | Height (cm) | |  | | | SD3 |
|  | | Weight (kg) | | ☐ <50  ☐ 50–60  ☐ 61–70  ☐ >70 | | | SD4 |
|  | | BMI(kg/m2) | |  | | | SD5 |
|  | | Marital status | | ☐ Single  ☐ Married  ☐ Other | | | SD6 |
| **Section II: Socioeconomic Information** | | | | | | | |
|  | | Education level | | ☐ No formal education  ☐ Primary  ☐ Secondary  ☐ College/University | | | SD7 |
|  | | Monthly income (INR) | | ☐ <5,000  ☐5,000–20,000  ☐ >20,000 | | | SD8 |
|  | | Years working as street vendor | | ☐ ≤5  ☐ 6–10  ☐ >10 | | | SD9 |
|  | | Type of work | | ☐ Food  ☐ Clothing  ☐ Stationery  ☐ Others | | | SD10 |
|  | | Hours spent outdoors daily | | ☐ <8  ☐ 8  ☐ >8 | | | SD11 |
| **Section III: Environmental Exposure** | | | | | | | |
|  | | Proximity to major roads/traffic areas (meters) | | ☐ <50  ☐ 50–100  ☐ 101–500  ☐ >500 | | | SD12 |
|  | | Presence of industries nearby | | ☐ Yes  ☐ No | | | SD13 |
|  | | Daily dust/smoke exposure | | ☐ Low  ☐ Moderate  ☐ High | | | SD14 |
|  | | What do you think about wearing mask at work | |  | | | SD15 |
| **Section IV: Health Information and Symptoms** | | | | | | | |
|  | | Exposure to second-hand smoke | | ☐ Yes  ☐ No | | | SD16 |
|  | | Shortness of breath during work | | ☐ Yes  ☐ No | | | SD17 |
|  | | Coughing during work | | ☐ Yes  ☐ No | | | SD18 |
|  | | Wheezing during work | | ☐ Yes  ☐ No | | | SD19 |
|  | | Cough with phlegm | | ☐ Yes  ☐ No | | | SD20 |
|  | | Frequency of breathlessness at work | | ☐ Rarely  ☐ Sometimes  ☐ Often  ☐ Always | | | SD21 |
|  | | Decrease in stamina over past year | | ☐ Yes  ☐ No | | | SD22 |
|  | | Chest tightness during/after work | | ☐ Yes  ☐ No | | | SD23 |
| **Section V: Alcohol Consumption** | | | | | | | |
|  | | Do you consume alcohol? | | ☐ Yes  ☐ No | | | SD24 |
|  | | If yes, frequency | | ☐Occasionally  ☐ Weekly  ☐ Daily | | | SD25 |
| **Section VI: Modified Borg Dyspnea Scale** | | | | | | | |
|
|  | **Rating** | | **Shortness of Breath Level** | | **At Rest (✓)** | **During Activity (✓)** | |
|  | 0 | | Nothing at all | |  |  | |
|  | 0.5 | | Very very slight | |  |  | |
|  | 1 | | Very slight | |  |  | |
|  | 2 | | Slight | |  |  | |
|  | 3 | | Moderate | |  |  | |
|  | 4 | | Somewhat severe | |  |  | |
|  | 5 | | Severe | |  |  | |
|  | 7 | | Very severe | |  |  | |
|  | 9 | | Very very severe | |  |  | |
|  | 10 | | Maximal | |  |  | |
|  | **Section VII: Pulmonary Function and Air Quality Data** | | | | | | |
|  | **Parameter** | | **Values** | | **Code** | | |
|  | BHT (sec) | |  | | SD37 | | |
|  | PEFR (L/min) | |  | | SD38 | | |
|  | AQI (current) | |  | | SD39 | | |
|  | AQI (1-month average) | |  | | SD40 | | |
|  | AQI (1-year average) | |  | | SD41 | | |

**Thank you for your time and participation!**
